# Supplementary material for: Pressure Point Thresholds and ME/CFS Comorbidity as Indicators of Patient’s Response to Manual Physiotherapy in Fibromyalgia
Source: MDPI journal article supplement (doi:10.3390/ijerph17218044), 2020-10-31
Supplement: s1 [file s1]

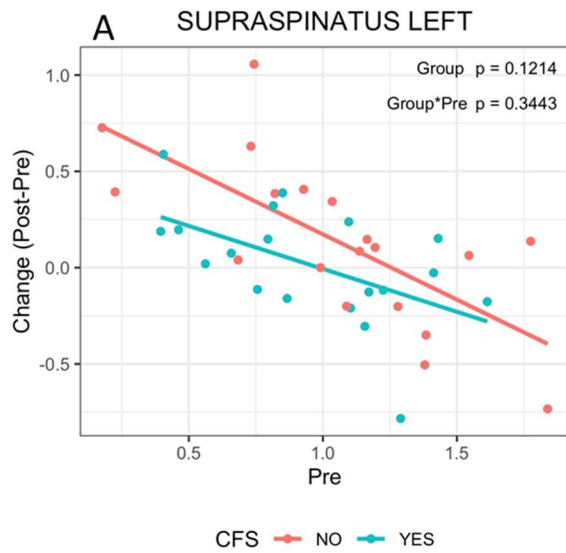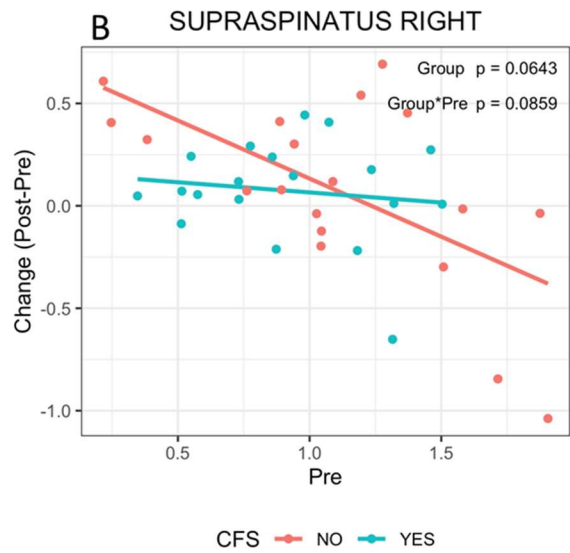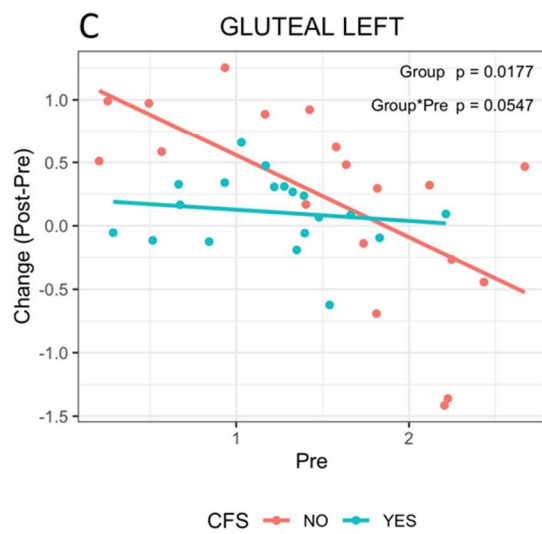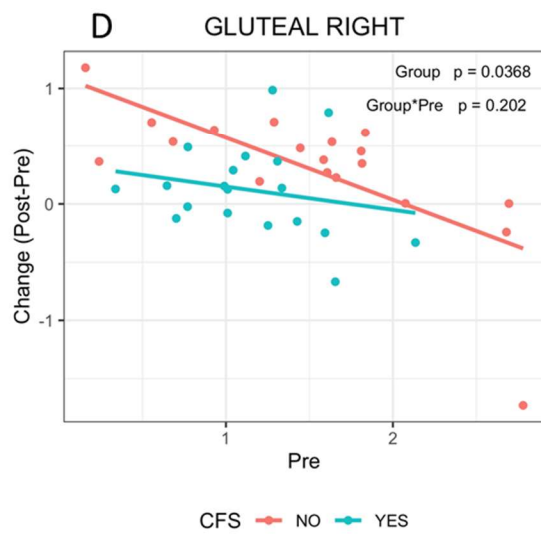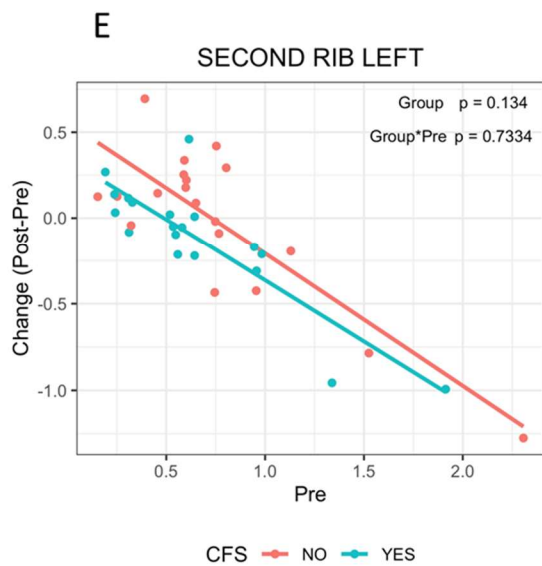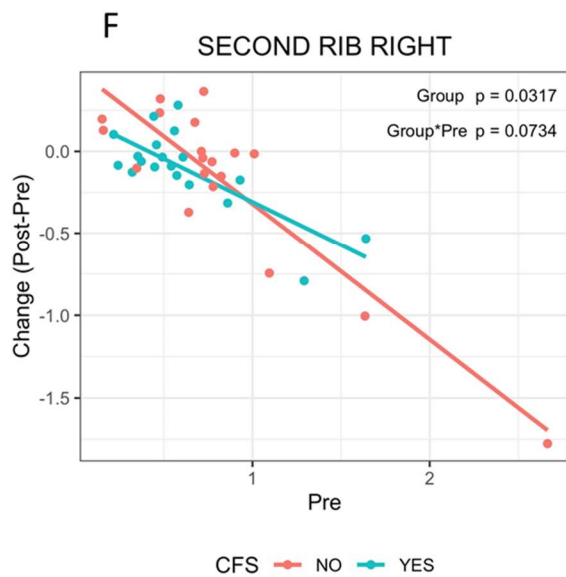

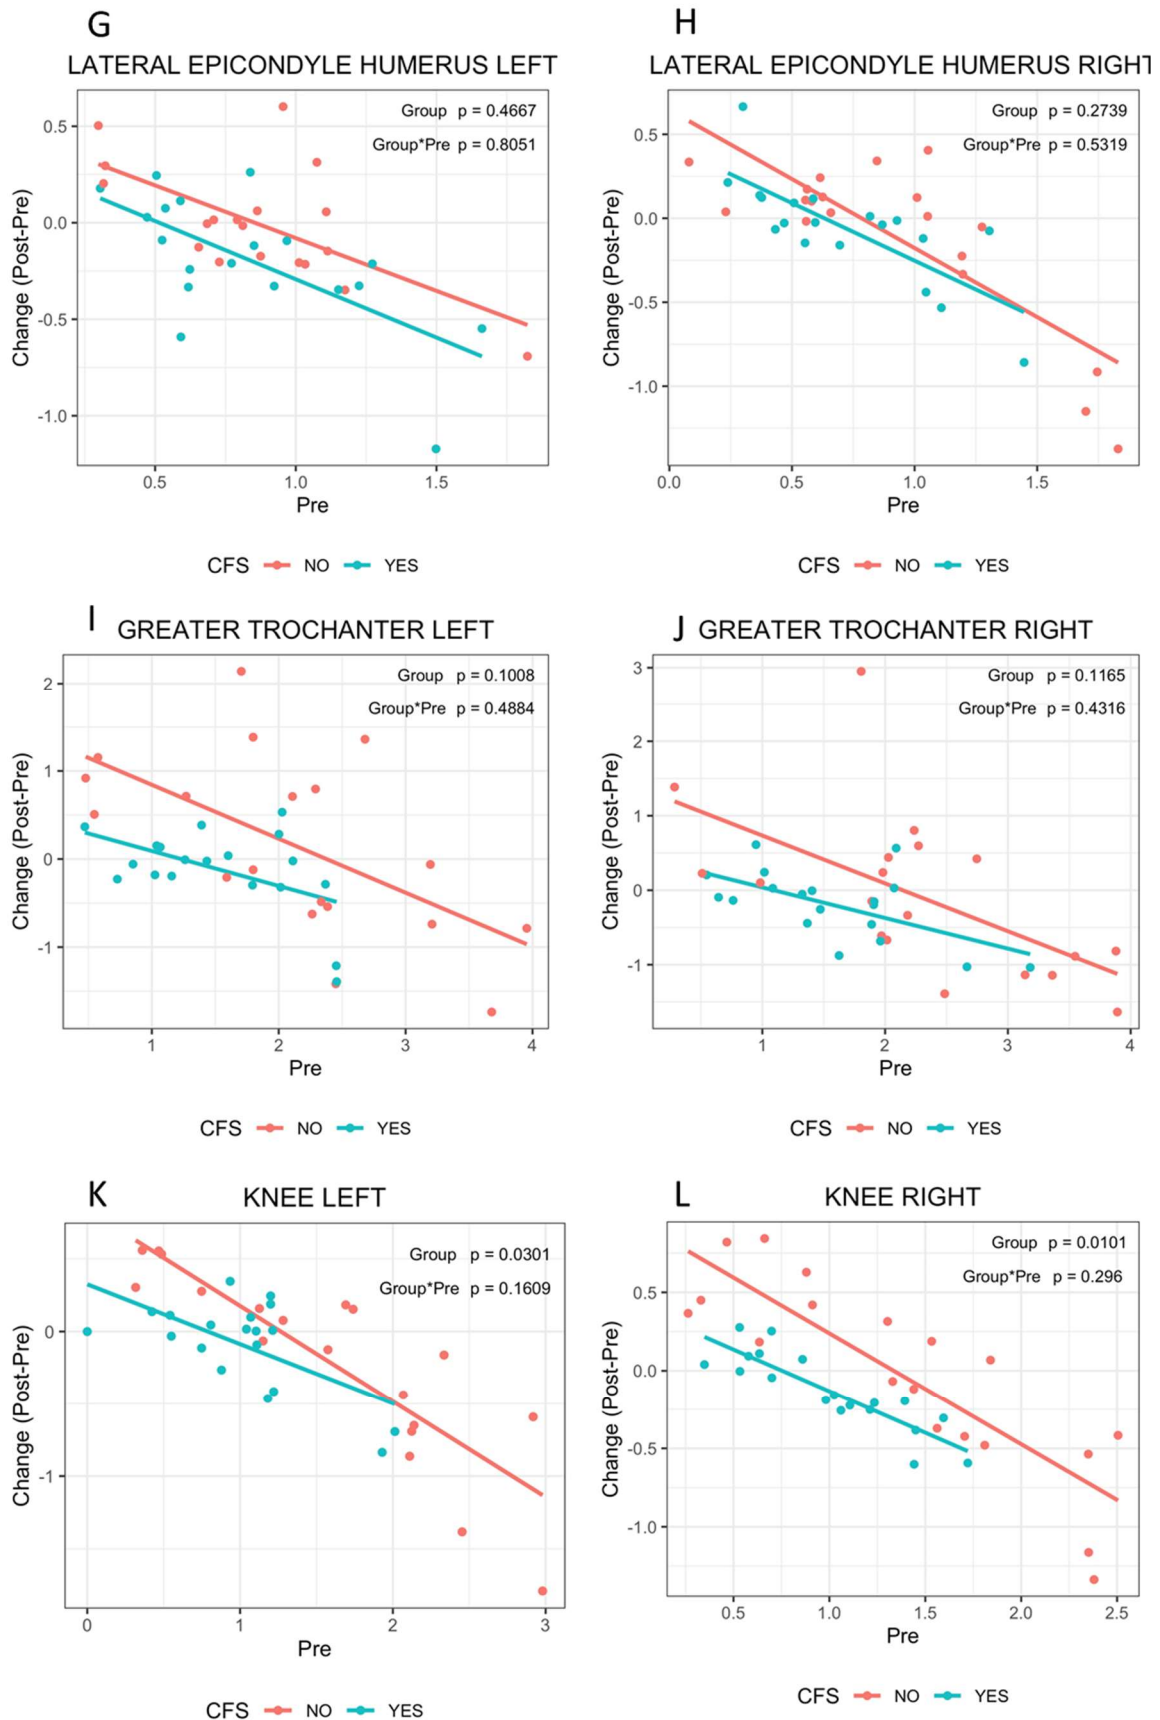

**Supplementary Figure S2.** Linear dependence of PPT baseline scores (Pre) with MT therapy response (Change: Post-Pre) in patients presenting FM with or without comorbid ME/CFS. The plots show the inverse correlation between pre-treatment PPT values and symptom improvement, measured as the acquired resistance to pressure-induced pain for the tender points indicated (A-L). Linear adjustments in the FM only subgroup are shown in red color, while those for the FM patients that present with ME/CFS comorbidity are shown in green. P values of the differences between FM only and FM with ME/CFS are shown.
