# Supplementary material for: Pressure Point Thresholds and ME/CFS Comorbidity as Indicators of Patient’s Response to Manual Physiotherapy in Fibromyalgia
Source: MDPI journal article supplement (doi:10.3390/ijerph17218044), 2020-10-31
Supplement: s1 [file s1]

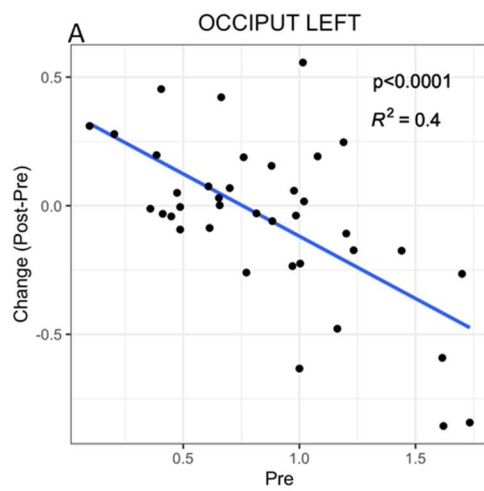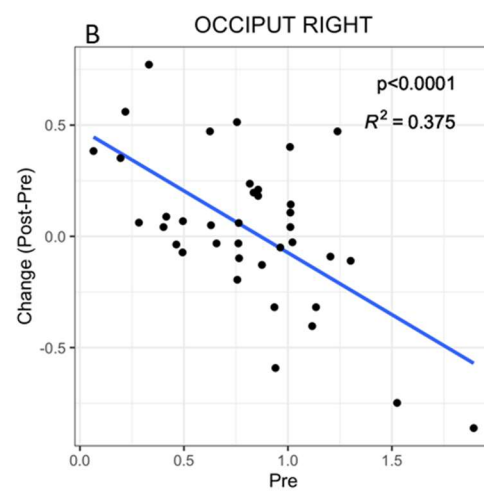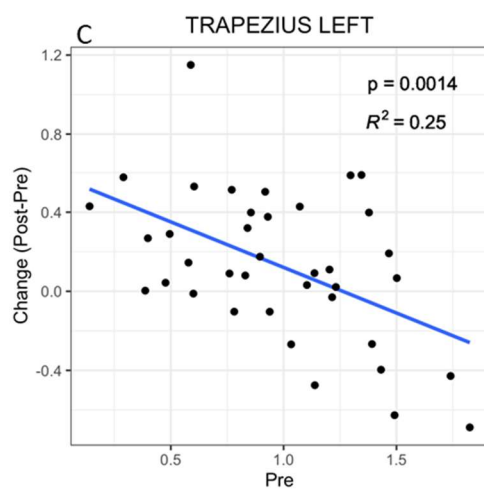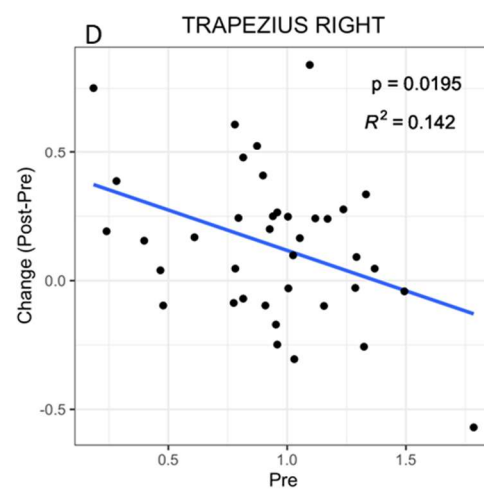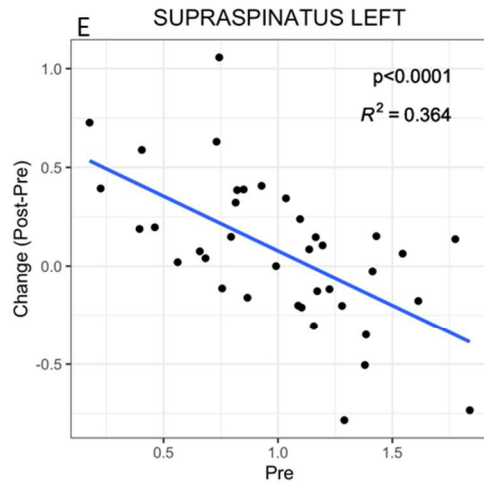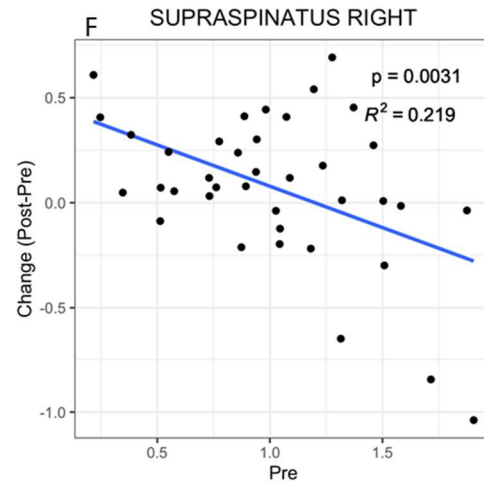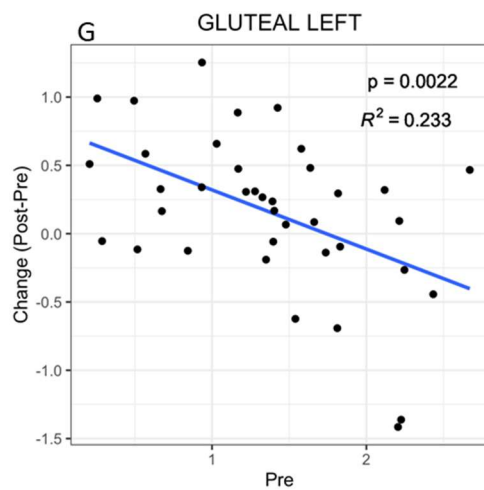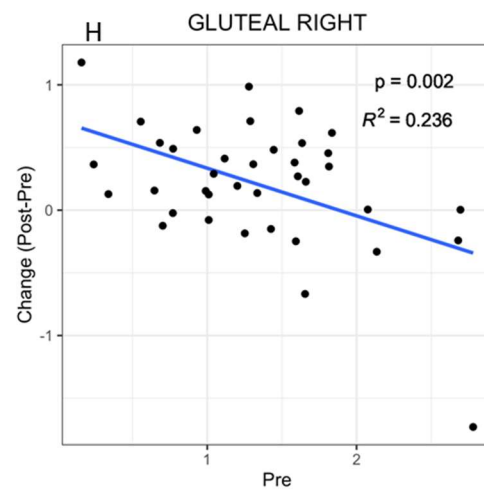

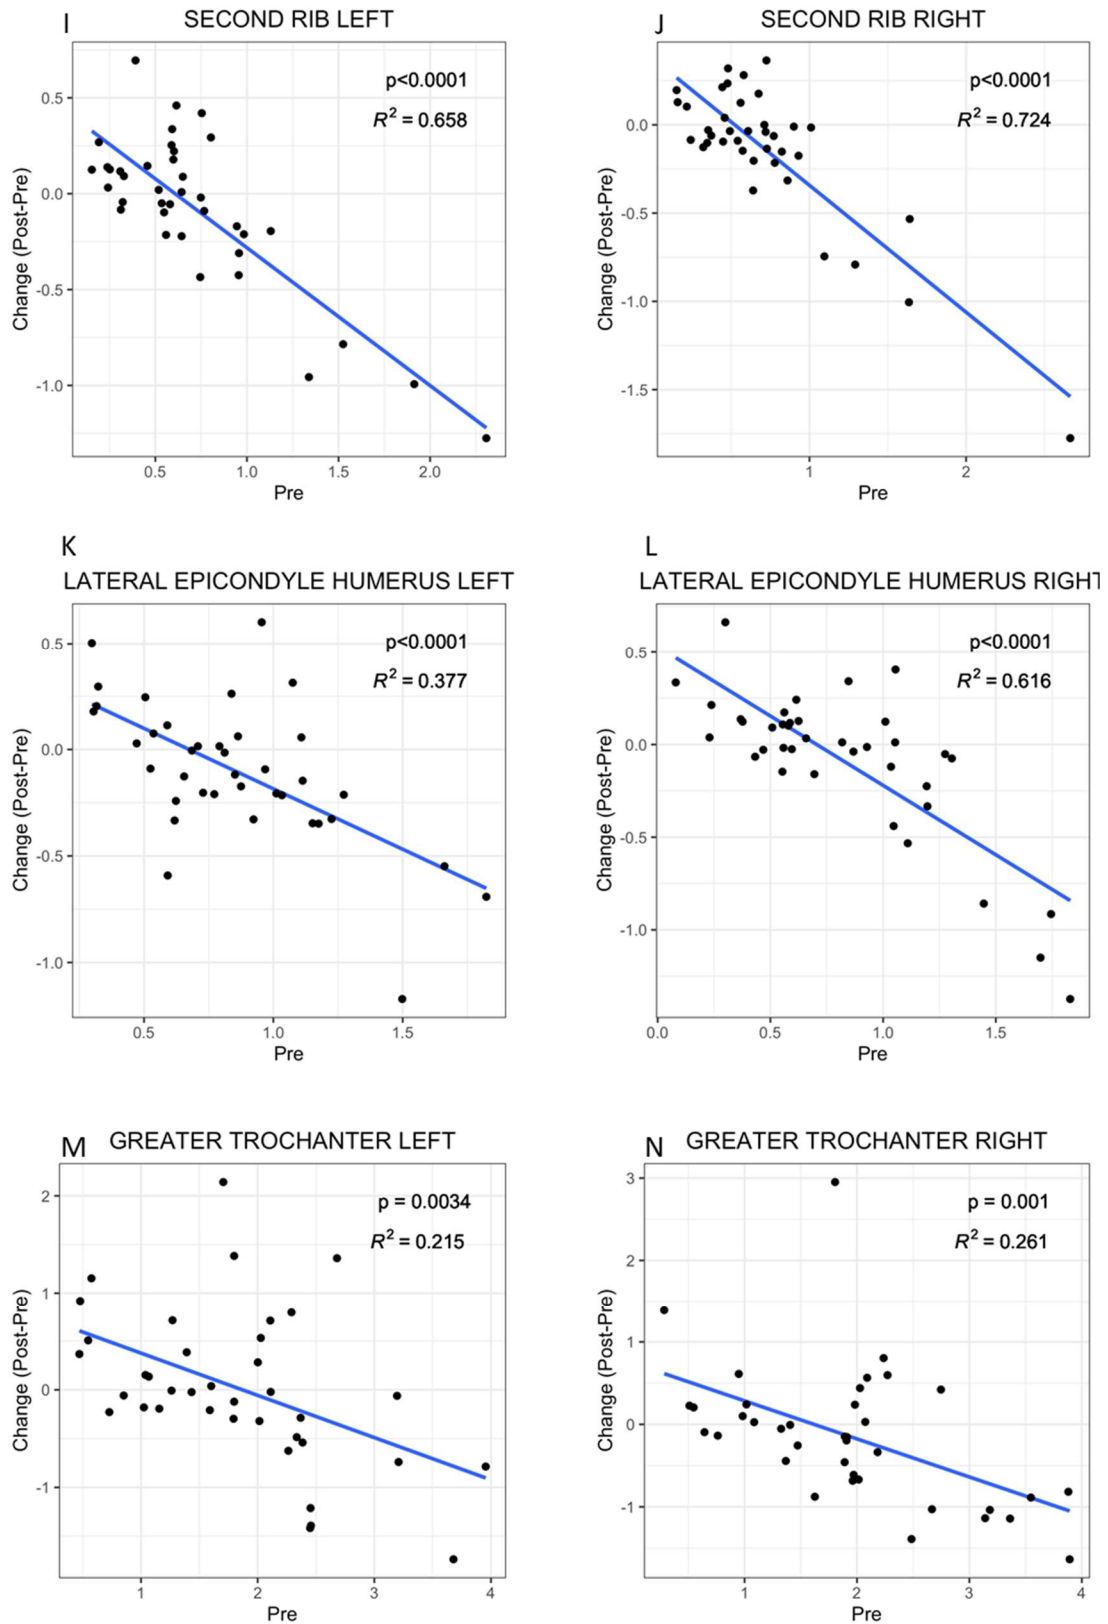

**Supplementary Figure S1.** Linear dependence of PPT baseline scores with MT therapy response. The plots show the inverse correlation between pre-treatment PPT values and the improvement measured as the acquired resistance to pressure-induced pain for the tender points (Change: Post-Pre) at the indicated tender points (A-N). P and R2 values are shown.
